# Supplementary material for: Spatiotemporal control of CRISPR/Cas9 gene editing
Source: PubMed Central journal article supplement (PMC8214627; doi:10.1038/s41392-021-00645-w), 2021-06-20
Supplement: 41392_2021_645_MOESM1_ESM.pdf [file 41392_2021_645_MOESM1_ESM.pdf]

This document certifies that the manuscript

## Spatiotemporal Control of CRISPR/Cas9 Gene Editing

prepared by the authors

Chenya Zhuo<sup>1</sup>, Jiabin Zhang<sup>1</sup>, Jung-Hwan Lee<sup>2</sup>, Ju Jiao<sup>3</sup>, Du Cheng<sup>4</sup>, Li Liu<sup>5</sup>, Hae-Won Kim<sup>2,\*</sup>, Yu Tao<sup>1,\*</sup>, and Mingqiang Li<sup>1,6\*</sup>

was edited for proper English language, grammar, punctuation, spelling, and overall style by one or more of the highly qualified native English speaking editors at SNAS.

This certificate was issued on **February 9, 2021** and may be verified on the [SNAS website](#) using the verification code **8869-722E-6FE1-A465-CB22**.

Neither the research content nor the authors' intentions were altered in any way during the editing process. Documents receiving this certification should be English-ready for publication; however, the author has the ability to accept or reject our suggestions and changes. To verify the final SNAS edited version, please visit our verification page at [secure.authorservices.springernature.com/certificate/verify](https://secure.authorservices.springernature.com/certificate/verify).

If you have any questions or concerns about this edited document, please contact SNAS at [support@as.springernature.com](mailto:support@as.springernature.com).
